# Supplementary material
Source: PubMed Central journal article supplement (PMC3190739)
Supplement: supp_M111.233403_jbc.M111.233403-1.pdf [file supp_M111.233403_jbc.M111.233403-1.pdf]

# Supplemental Fig. 1

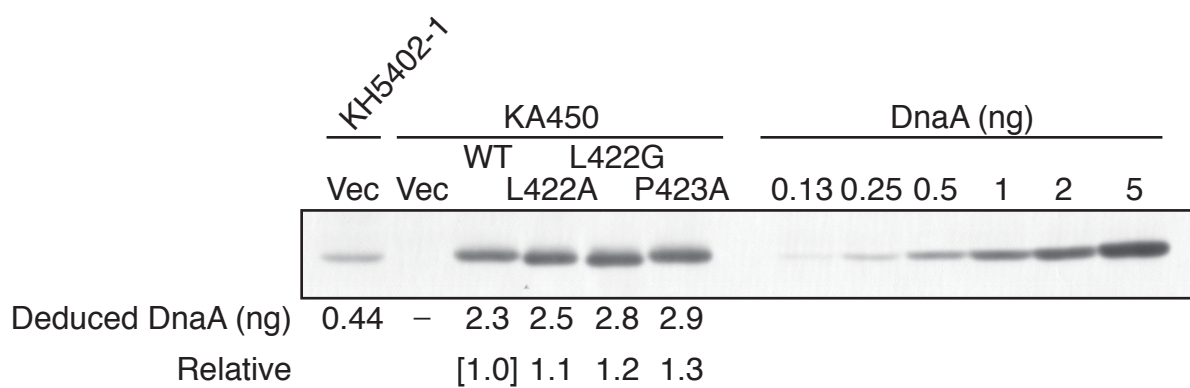

### **Supplemental Figure Legend**

Supplemental Fig. 1. Cellular levels of DnaA mutant proteins. Immunoblot analysis was performed as described previously (1). Briefly, KA450 [*dnaA17* (Am)] cells bearing pING1 (Vec), pKA234 (WT), pL422A (L422A), pL422G (L422G) and pP423A (P423A), and KH5402-1 cells bearing pING1 were exponentially grown at 37°C in LB medium containing thymine (50 µg/ml) and ampicillin (50 µg/ml). Portions of the cultures equivalent to a culture volume of 100 µl at an optical density ( $A_{660}$ ) of 0.2 were subjected to immunoblot analysis. The indicated amounts of purified DnaA protein were mixed with a whole cell extract from KA450 cells carrying pING as a quantitative standard. Relative ratios of DnaA content of cells carrying the indicated plasmids to those of cells carrying pKA234 are shown.

### **Reference**

1. Keyamura, K., Abe, Y., Higashi, M., Ueda, T., and Katayama, T. (2009) *J. Biol. Chem.* **284**, 25038-25050
